# Supplementary material
Source: MDPI journal article supplement (https://www.mdpi.com/2076-3417/13/24/13282)
Supplement: s1 [file s1]

Supplementary materials

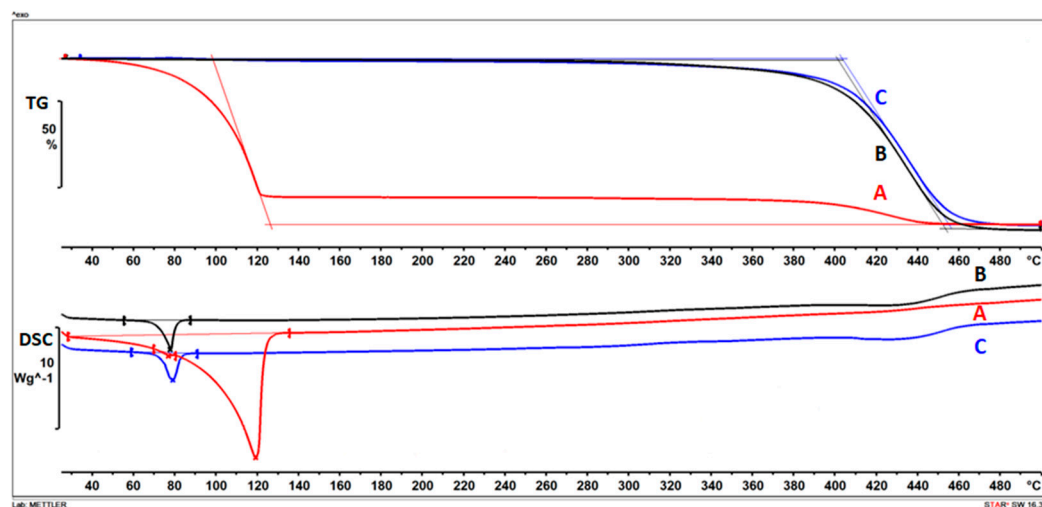

**Figure S1.** DSC and TG curves of SLM dispersions: (A) without water evaporation, (B) after water evaporation and (C) after centrifugation and water evaporation; before thermal analysis.

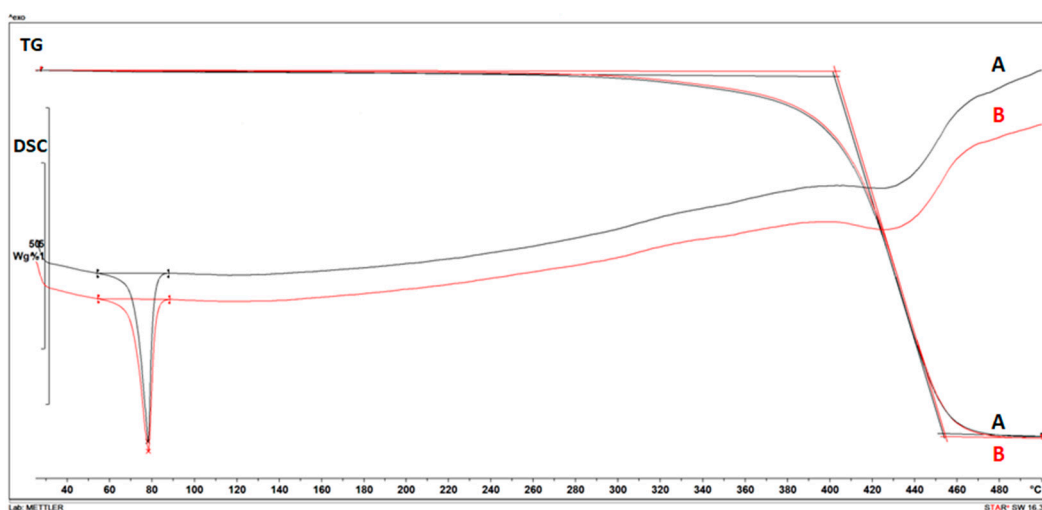

**Figure S2.** DSC and TG curves of SLM dispersions: (A) F11-SLM dispersion with 1% of Ind and (B) F11-SLM dispersion with 1% of Ind after shaking with methanol and evaporation

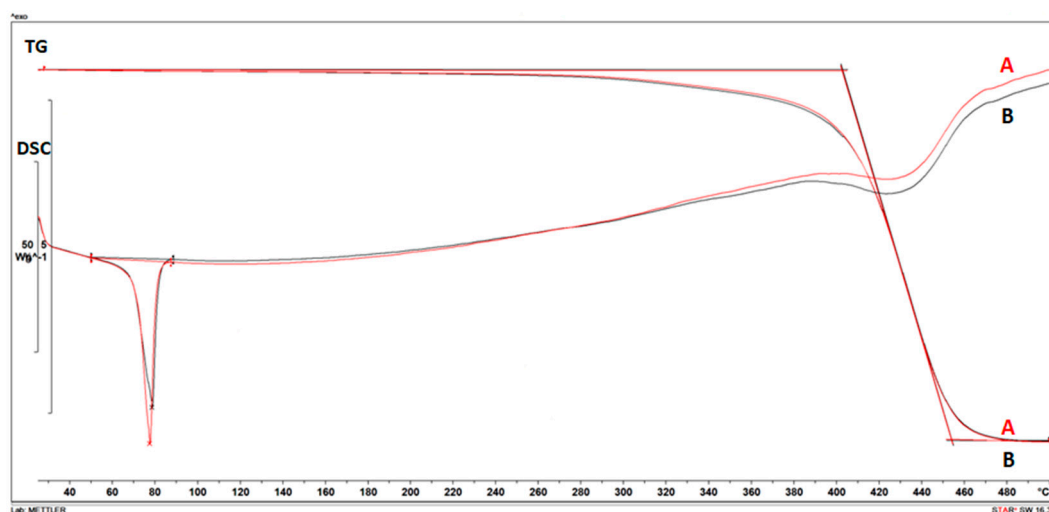

**Figure S3.** DSC and TG curves of F10-SLM dispersion with Compritol and 0.2% of Ind: (A) after preparation and (B) after one year of refrigerated storage.

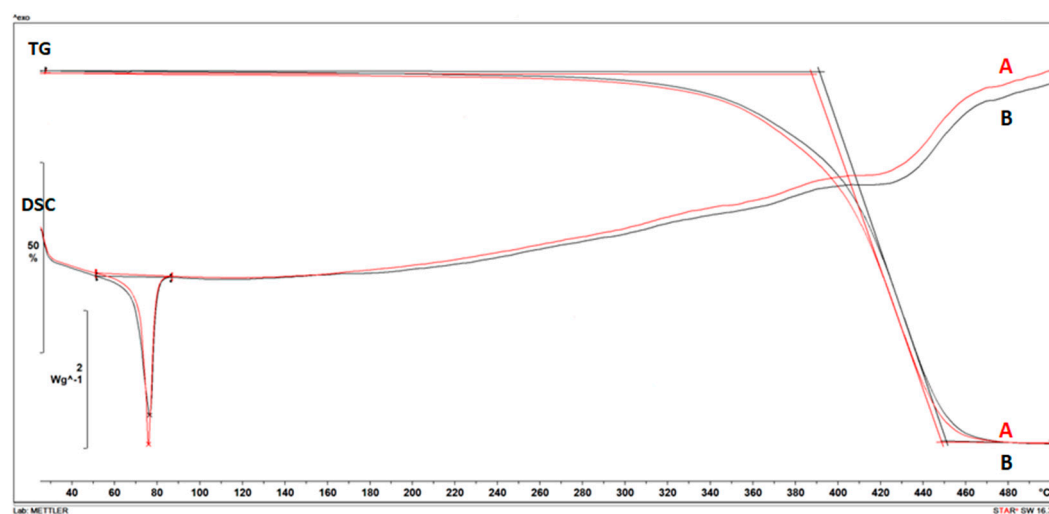

**Figure S4.** DSC and TG curves of F5-SLM dispersion with Compritol and 2% of CsA: (A) after preparation and (B) after one year of refrigerated storage.

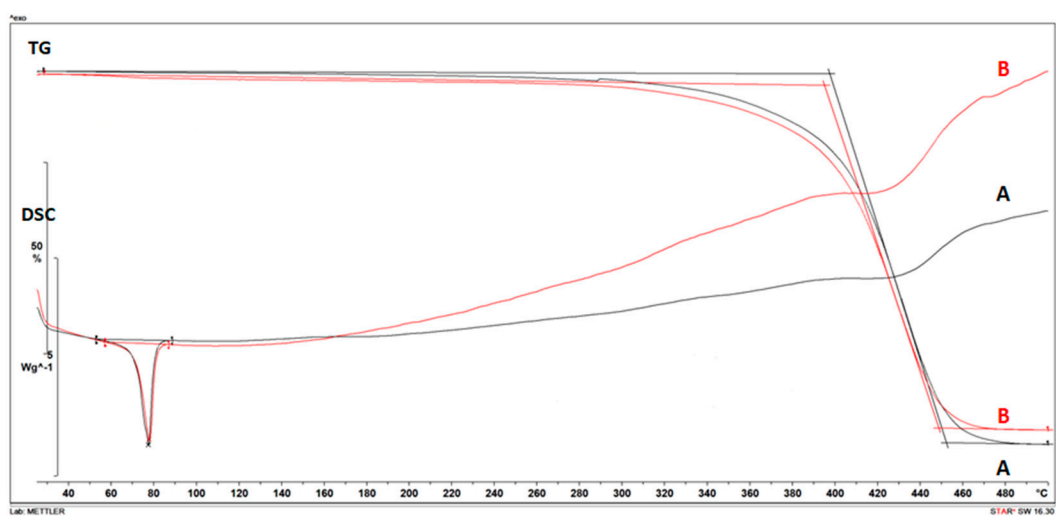

**Figure S5.** DSC and TG curves of F4-SLM dispersion with Compritol and 1% of CsA: (A) in the form of aqueous dispersion after two years of refrigerated storage and (B) in the form of spray-dried powder with PVP after two years storage at room temperature.
